# Supplementary material for: Simple hybrid polymeric nanostructures encapsulating macro-cyclic Gd/Eu based complexes: luminescence properties and application as MRI contrast agent
Source: Royal Society of Chemistry journal article supplement (doi:10.1039/d3nr06162k), 2024-01-01
Supplement: d3nr06162k1.pdf [file d3nr06162k1.pdf]

## Supporting Information

for

Simple hybrid polymeric nanostructures encapsulating macrocyclic Gd/Eu based complexes:  
luminescence properties and application as MRI contrast agent

Marjorie Yon,<sup>a</sup> Lucie Esmangard,<sup>a</sup> Morgane Enel,<sup>b</sup> Franck Desmoulin,<sup>c,d</sup> Carine Pestourie,<sup>d</sup>  
Nadine Leygue,<sup>b</sup> Christophe Mingotaud,<sup>a</sup> Chantal Galaup,<sup>\*b</sup> Jean-Daniel Marty<sup>\*a</sup>

<sup>a</sup> Laboratoire Softmat, University of Toulouse, CNRS UMR 5623, University Toulouse III – Paul Sabatier, France.118, route de Narbonne 31062 Toulouse Cedex 9, France

<sup>b</sup> Laboratoire SPCMIB, CNRS UMR 5068, University of Toulouse, University Toulouse III - Paul Sabatier 118, route de Narbonne 31062 Toulouse Cedex 9, France

<sup>c</sup> Toulouse NeuroImaging Center (ToNIC), Inserm, University of Toulouse—Paul Sabatier, Toulouse, France

<sup>d</sup> CREFRE-Anexplo, University of Toulouse, Inserm, UT3, ENVT, Toulouse, France

| Table of contents                                                                                                                                                         | Page |
|---------------------------------------------------------------------------------------------------------------------------------------------------------------------------|------|
| <b>Scheme S1:</b> Synthesis of the <b>PCTA-COOH</b> ligand                                                                                                                | S3   |
| <b>Figure S1.</b> ESI <sup>+</sup> HRMS spectrum of <b>Eu<sup>3+</sup>.PCTA-COOH complex</b>                                                                              | S4   |
| <b>Figure S2.</b> UPLC/UV-MS analysis of <b>Eu<sup>3+</sup>.PCTA-COOH complex</b>                                                                                         | S5   |
| <b>Figure S3.</b> ESI <sup>+</sup> HRMS spectrum of <b>Gd<sup>3+</sup>.PCTA-COOH complex</b>                                                                              | S6   |
| <b>Figure S4.</b> UPLC/UV-MS analysis of <b>Gd<sup>3+</sup>.PCTA-COOH complex</b>                                                                                         | S7   |
| <b>Figure S5.</b> Evaluation of relative amount of Ln ions for the different systems of interest being submitted to a dialysis/centrifugation process.                    | S8   |
| <b>Figure S6.</b> Correlation function obtained on Gd <sup>3+</sup> /Zr@HPICs, Gd <sup>3+</sup> .PCTA-COOH/Zr@HPICs and Gd <sup>3+</sup> .PCTA-COOH from DLS measurements | S9   |
| <b>Figure S7.</b> Effects of added ions on the emission lifetimes of HPICs particles                                                                                      | S10  |
| <b>Figure S8.</b> Effects of pH on the emission intensity                                                                                                                 | S10  |
| <b>Figure S9.</b> Change in the longitudinal relaxation time as a function of the concentration of Gd <sup>3+</sup> ions in water at physiological pH                     | S11  |

**Scheme S1.** Synthesis of the **PCTA-COOH** ligand described in “Efficient Synthesis of a Family of Bifunctional Chelators Based on the PCTA[12] Macrocycle Suitable for Bioconjugation”. N. Leygue, M. Enel, A. Diallo, B. Mestre-Voegtlé, C. Galaup, and C. Picard. *Eur. J. Org. Chem.* 2019, 2899–2913.

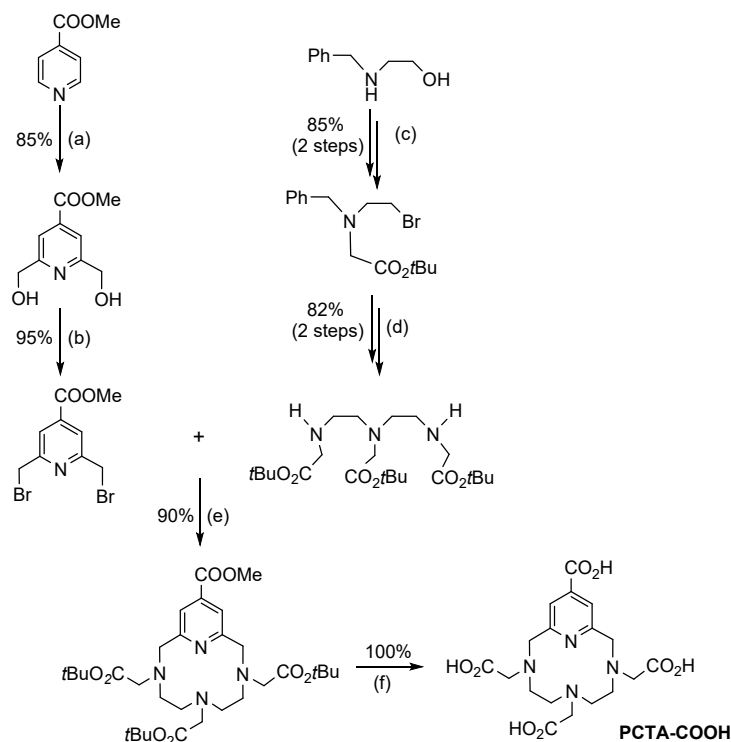

*Reagents and conditions:* (a)  $(\text{NH}_4)_2\text{S}_2\text{O}_8$ ,  $\text{H}_2\text{SO}_4$  cat., MeOH,  $\text{H}_2\text{O}$ , reflux, 2 h; (b)  $\text{PBr}_3$ ,  $\text{CH}_2\text{Cl}_2$ , reflux, 2 h; (c) i)  $\text{BrCH}_2\text{CO}_2t\text{Bu}$ ,  $\text{K}_2\text{CO}_3$ ,  $\text{CH}_3\text{CN}$ , rt, 24 h, 100%; ii). *N*-bromosuccinimide,  $\text{PPh}_3$ ,  $\text{CH}_2\text{Cl}_2$ , rt 16 h, 85%; (d) i)  $\text{NH}_2\text{CH}_2\text{CO}_2t\text{Bu}$  Hydrochloride salt,  $\text{K}_2\text{CO}_3$ ,  $\text{CH}_3\text{CN}$ , reflux, 24 h, 82%; ii)  $\text{Pd/C}$  (10%),  $\text{H}_2$  gas (6 bars), MeOH, rt, 12 h; 100%; (e) [reagents] =  $2 \times 10^{-3}$  M,  $\text{Na}_2\text{CO}_3$ ,  $\text{CH}_3\text{CN}$ , reflux, 64 h. (f) 6N  $\text{HCl}_{\text{aq}}$ , reflux, 24 h.

Cone voltage = 30 V  
ME176-Eu 69 (0.689) AM2 (Ar,14000.0,0.00,0.00); Cm (64:79-23:35x2.000)

XEVO G2 QTOF

24-Feb-2017 11:01:05  
1: TOF MS ES+  
9.11e5

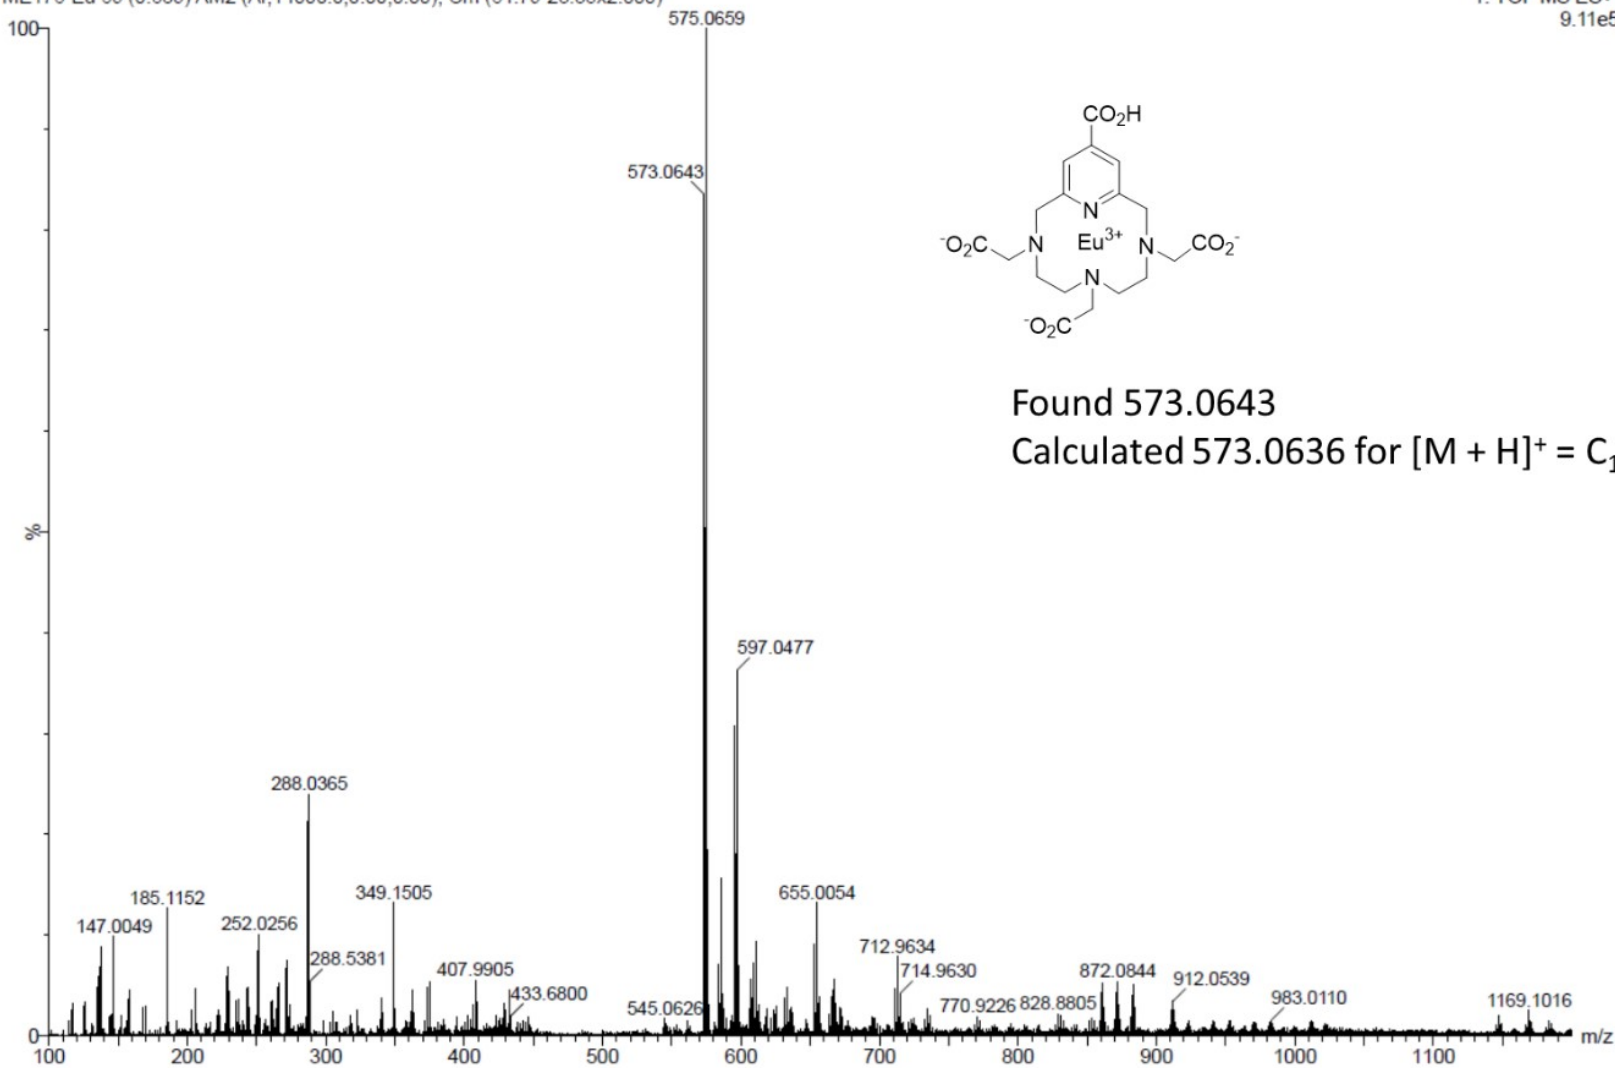

Figure S1. ESI<sup>+</sup> HRMS spectrum of Eu<sup>3+</sup>.PCTA-COOH complex.

a)

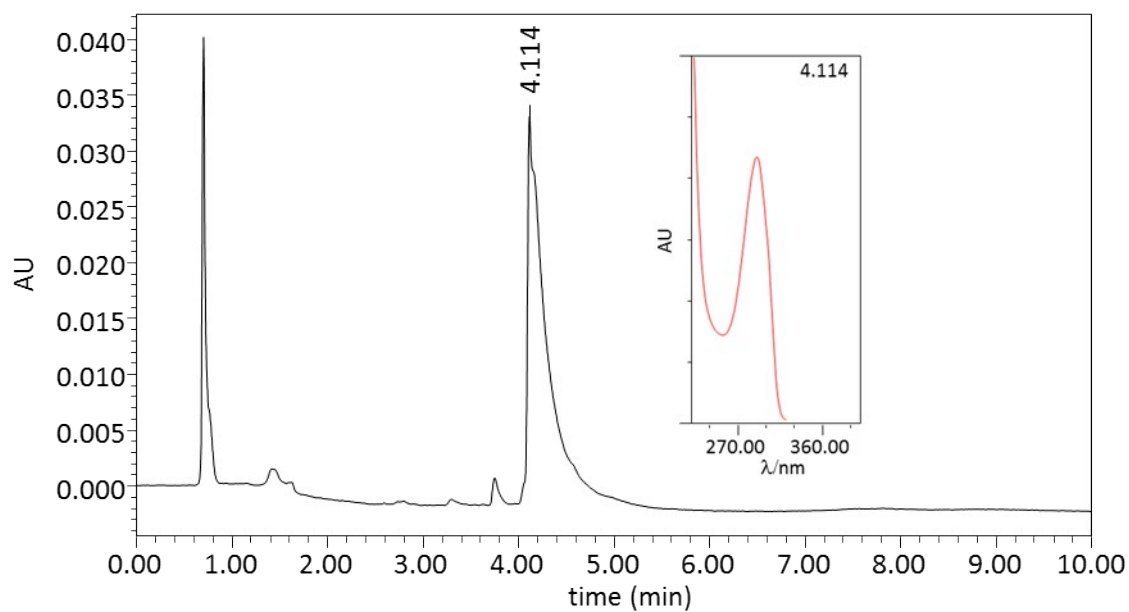

b)

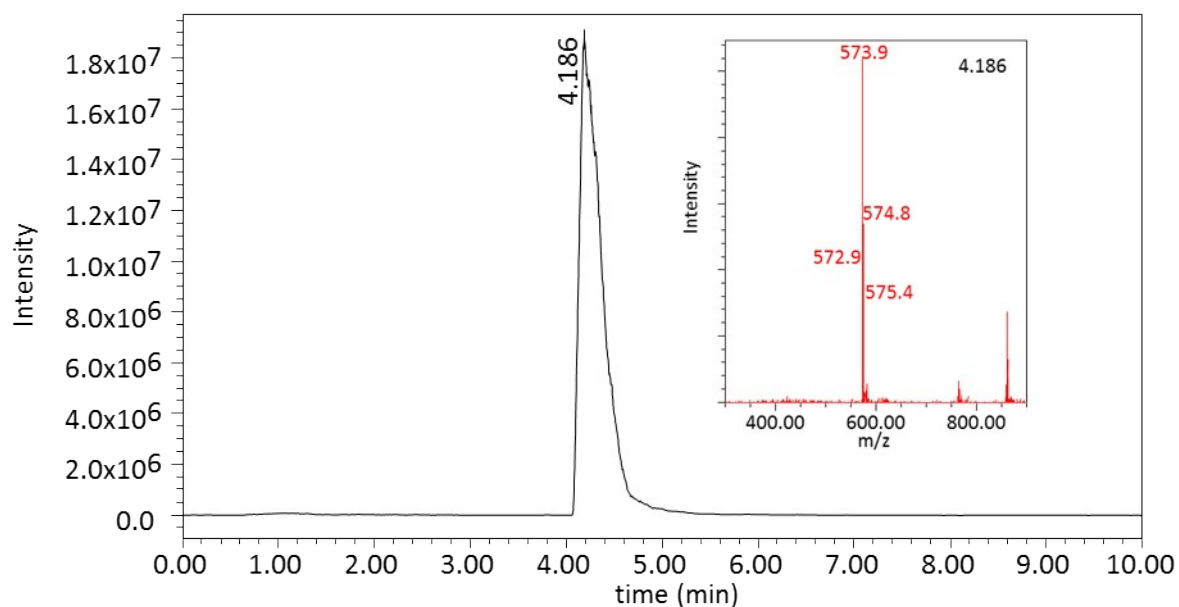

**Figure S2.** UPLC/UV-MS analysis of **Eu<sup>3+</sup>.PCTA-COOH complex**. a) Chromatogram monitored at 290 nm (inset: UV absorption spectrum in arbitrary unit -AU- at 4.114 min) and b) trace chromatogram of  $m/z = 573$  ( $[M + H]^+$ ) (inset = ESI positive mode mass spectrum at 4.186 min). UPLC conditions are provided in the experimental part.

Cone voltage = 30 V  
ME176-Gd 54 (0.545) AM2 (Ar,14000.0,0.00,0.00); Cm (54:62-21:27x2.000)

XEVO G2 QTOF

24-Feb-2017 10:26:32  
1: TOF MS ES+  
1.81e5

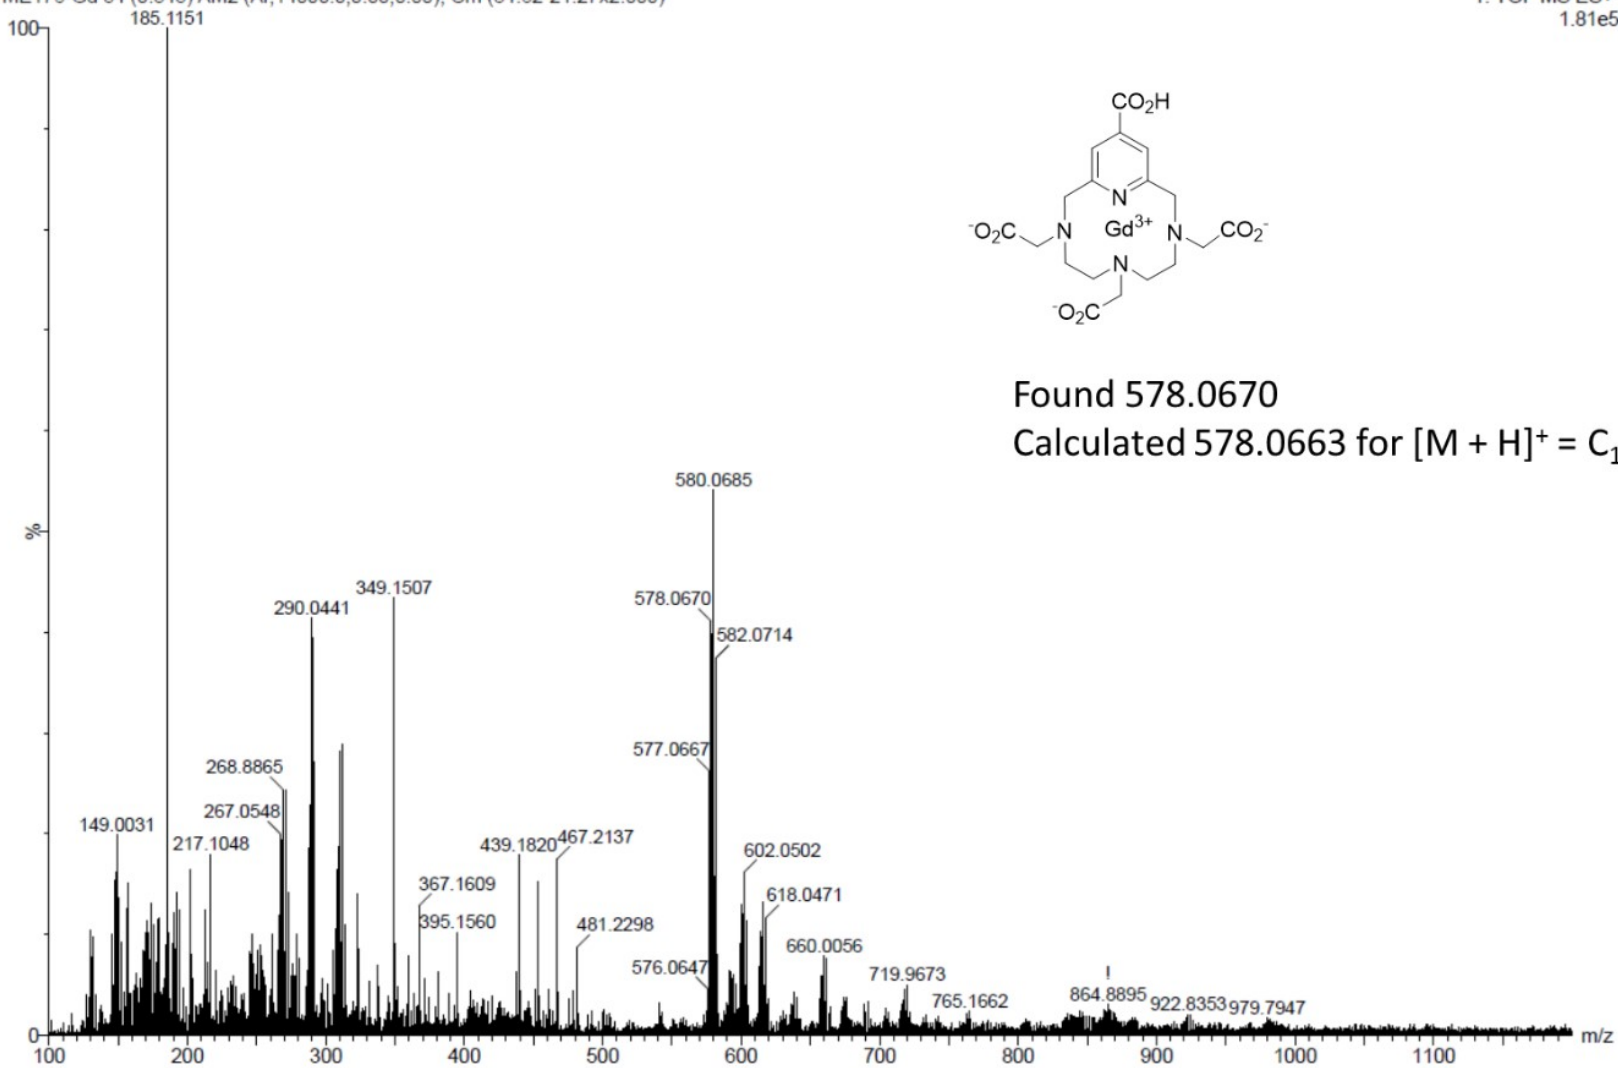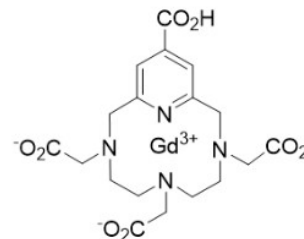

Found 578.0670

Calculated 578.0663 for [M + H]<sup>+</sup> = C<sub>18</sub>H<sub>22</sub>N<sub>4</sub>O<sub>8</sub><sup>156</sup>Gd

Figure S3. ESI<sup>+</sup> HRMS spectrum of Gd<sup>3+</sup>.PCTA-COOH complex.

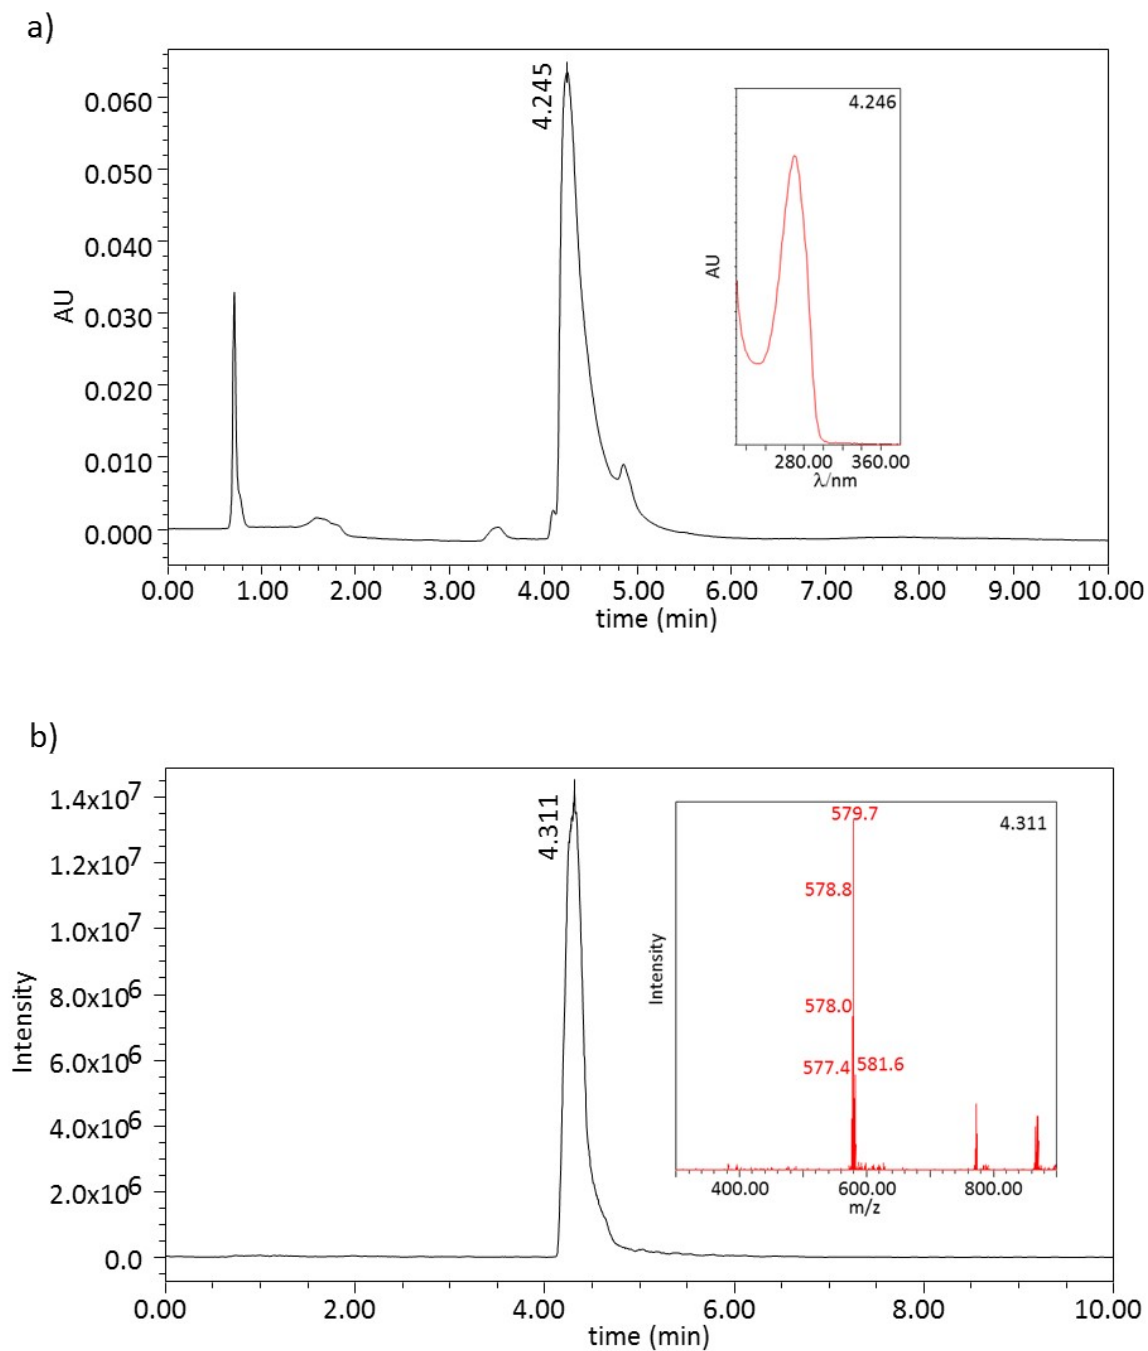

**Figure S4.** UPLC/UV-MS analysis of  $\text{Gd}^{3+}$ .PCTA-COOH complex. a) Chromatogram monitored at 290 nm (inset: UV absorption spectrum in arbitrary unit -AU- at 4.246 min) and b) trace chromatogram of  $m/z = 580$  ( $[\text{M} + \text{H}]^+$ ) (inset = ESI positive mode mass spectrum at 4.311 min). UPLC conditions are provided in the experimental part.

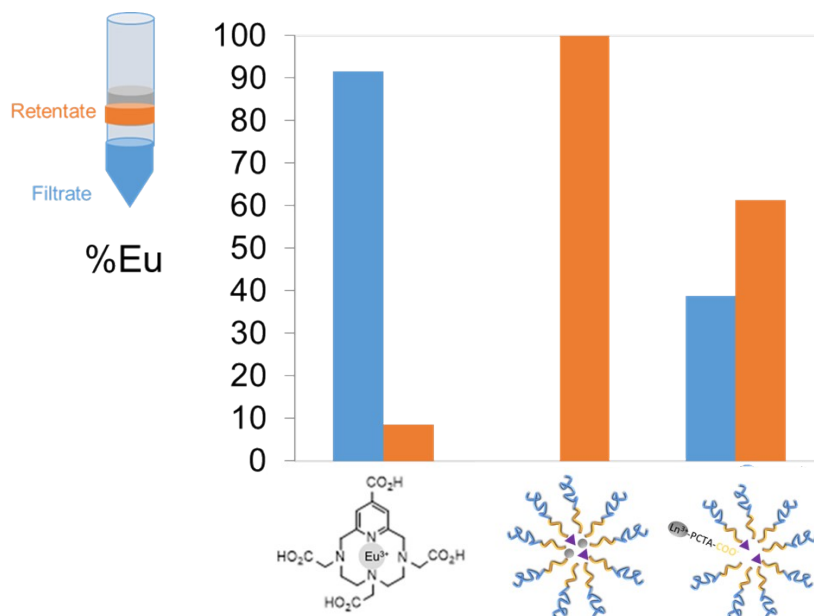

**Figure S5.** Evaluation of relative amount of Ln ions for the different systems of interest being submitted to a dialysis/centrifugation process. Solutions of  $\text{Ln}^{3+}/\text{Zr@HPICs}$ ,  $\text{Ln}^{3+}.\text{PCTA-COOH}/\text{Zr@HPICs}$  and  $\text{Ln}^{3+}.\text{PCTA-COOH}$  were prepared according to the method depicted in supporting information. The composition of HPICs was adjusted in such way that electroneutrality between the positive charges of  $\text{ZrO}^{2+}$  and  $\text{Ln}^{3+}$  ions and the potentially available negative charges from the ionized or ionizable carboxylic acid, was reached. Once prepared, these samples were filtered with centrifugal filters (molecular weight cut-off 3 kDa) (Ultracel®-3K - Millipore Ireland Ltd) at 6500 rpm for 40 min. ICP-AES was further used to evaluate the relative amount of Ln ions in both retentate and filtrate. As expected, whereas  $\text{Ln}^{3+}/\text{Zr@HPICs}$  is exclusively present in the retentate part, most (90%) of  $\text{Ln}^{3+}.\text{PCTA-COOH}$  complex was found in the filtrate. In the case of  $\text{Ln}^{3+}.\text{PCTA-COOH}/\text{Zr@HPICs}$ , 40% of introduced complex was filtered through the dialysis membranes. This should correspond to complexes which are not trapped in HPIC structures.



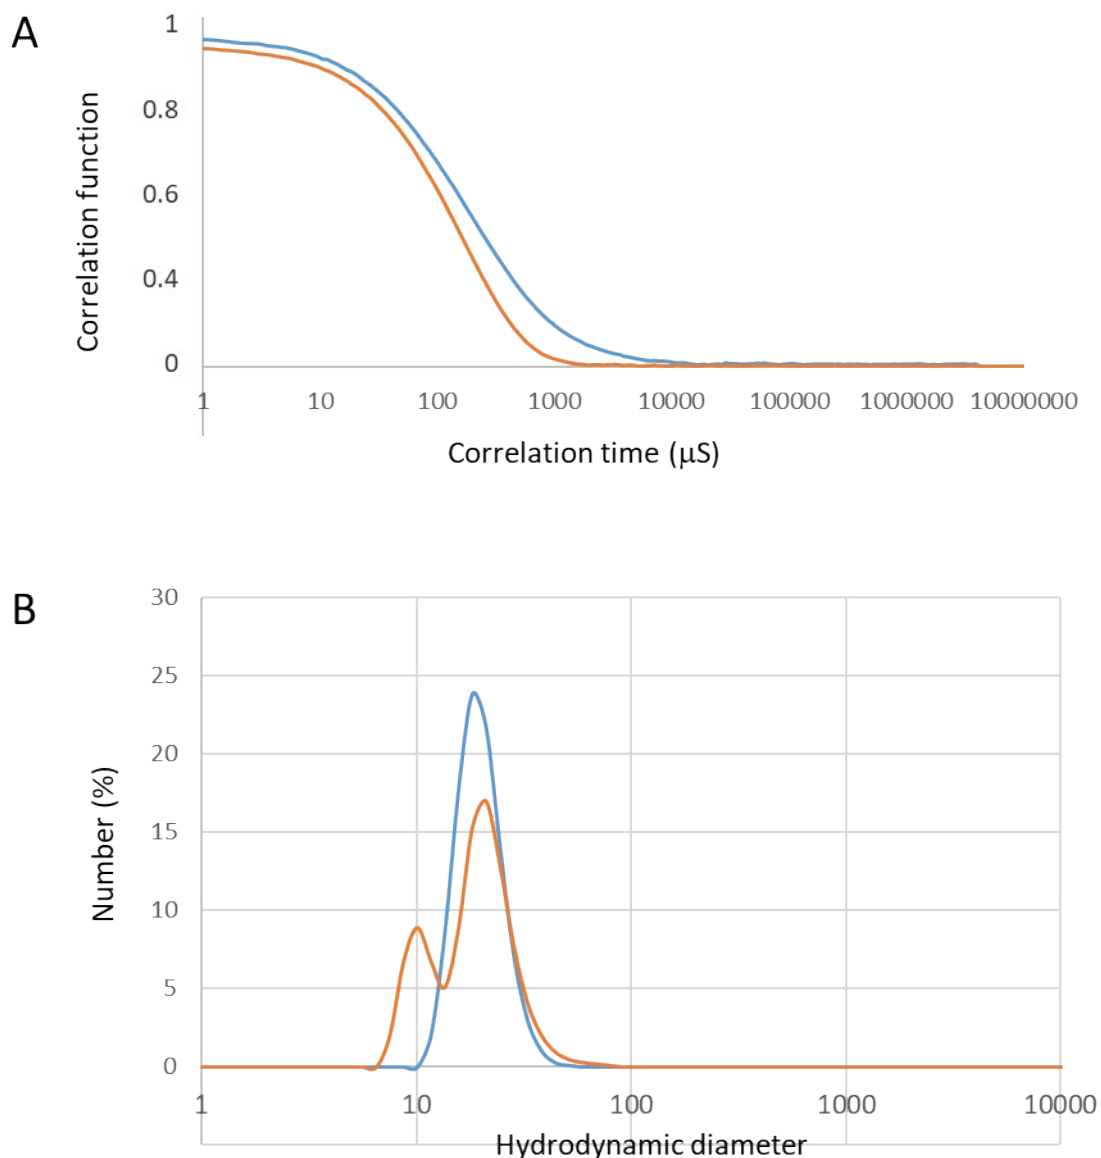

**Figure S6.** Correlation function (A) obtained for Gd<sup>3+</sup>/Zr@HPICs (orange), Gd<sup>3+</sup>.PCTA-COOH/Zr@HPICs (blue) and Gd<sup>3+</sup>.PCTA-COOH (grey) solutions by DLS measurements (polymer concentration equal to 0.1%wt) at pH 7 and the corresponding the number-averaged hydrodynamic diameter distribution (B). In the case of Gd<sup>3+</sup>.PCTA-COOH measured signal is too low to give an usable correlation function.

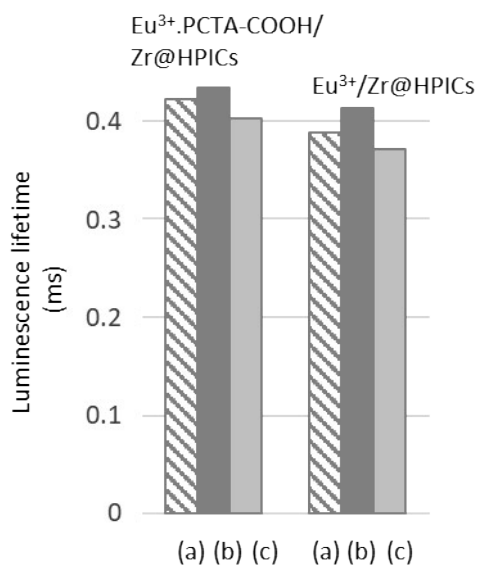

**Figure S7.** Effects of added ions on the emission lifetimes of HPIC particles. (a)  $\text{Eu}^{3+}$ .PCTA-COOH/Zr@HPICs or  $\text{Eu}^{3+}$ /Zr@HPICs ( $[\text{Eu}] = 0.12 \text{ mM}$ ) in Tris buffered saline 50 mM pH 7.4 ( $[\text{NaCl}] = 0.15 \text{ M}$ ), and after adding (b) phosphate (0.10 mM) and (c) calcium ions (0.25 mM).

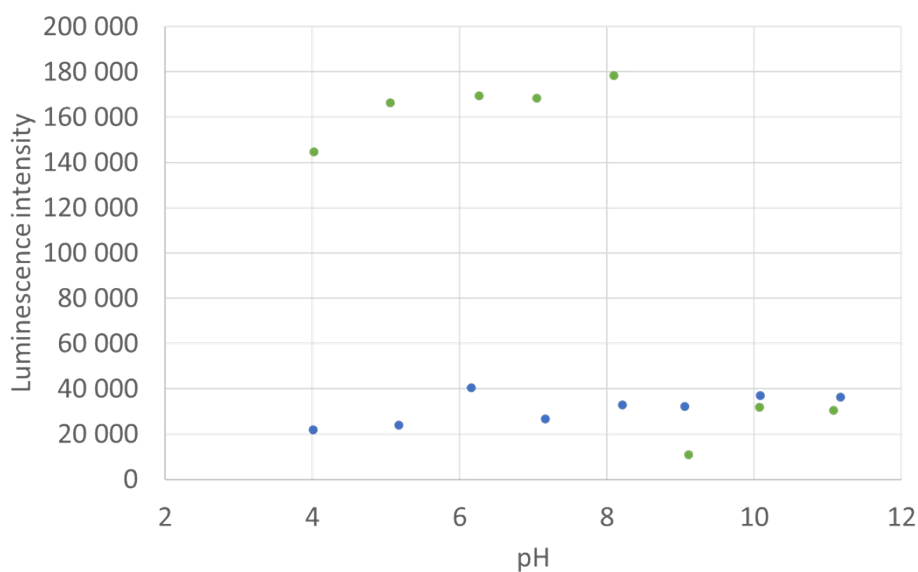

**Figure S8.** Effects of pH on the emission intensity (area-normalized emission spectra,  $\lambda_{\text{exc}} = 249 \text{ nm}$ ) in HPIC particles. (blue circle)  $\text{Eu}^{3+}$ /Zr@HPICs ( $[\text{Eu}] = 0.14 \text{ mM}$ ) and (green circle)  $\text{Eu}^{3+}$ @HPICs ( $[\text{Eu}] = 1.96 \text{ mM}$ )

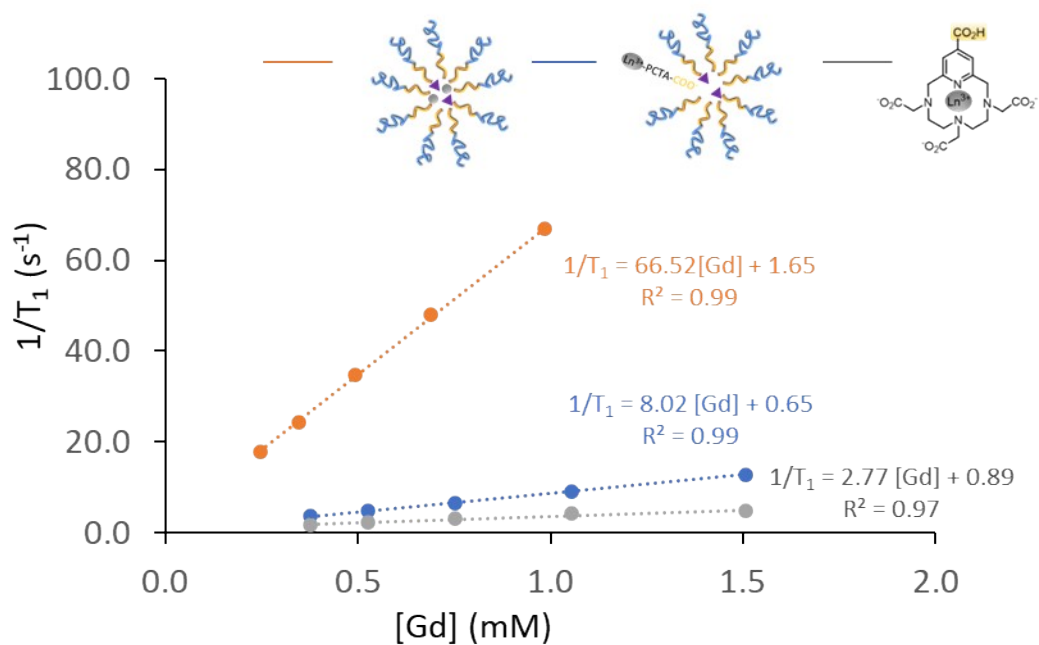

**Figure S9.** Change in the longitudinal relaxation time as a function of the concentration of  $Gd^{3+}$  ions in water at physiological pH ( $T = 298$  K) for  $Gd^{3+}/Zr@HPICs$  (orange),  $Gd^{3+}.PCTA-COOH/Zr@HPICs$  (blue) and  $Gd^{3+}.PCTA-COOH$  (grey).
